# Supplementary material
Source: PubMed Central journal article supplement (PMC4282559)
Supplement: embj0033-2829-sd5.pdf [file embj0033-2829-sd5.pdf]

**Table S1. Size exclusion chromatography analysis (Superdex 200)**

| Sample injected                                               | Number of peaks | V <sub>R</sub> peak 1 [ml] | Components peak 1*                                          | V <sub>R</sub> peak 2 [ml] | Components peak 2*                                  |
|---------------------------------------------------------------|-----------------|----------------------------|-------------------------------------------------------------|----------------------------|-----------------------------------------------------|
| Mpp6                                                          | 1               | 1.48                       | Mpp6                                                        |                            |                                                     |
| Mtr4                                                          | 1               | 1.24                       | Mtr4                                                        |                            |                                                     |
| Mtr4 + Mpp6                                                   | 2               | 1.23                       | Mtr4                                                        | 1.46                       | Mpp6                                                |
| Rrp6 <sub>ΔNLS</sub> /Rrp47                                   | 1               | 1.20                       | Rrp6 <sub>ΔNLS</sub> /Rrp47                                 |                            |                                                     |
| Mtr4 + Rrp6 <sub>ΔNLS</sub> /Rrp47 + Mpp6                     | 2               | 1.13                       | Mtr4/Rrp6 <sub>ΔNLS</sub> /Rrp47                            | 1.46                       | Mpp6                                                |
| Rrp6 <sub>ΔN</sub>                                            | 1               | 1.25                       | Rrp6 <sub>ΔN</sub>                                          |                            |                                                     |
| Exo-9                                                         | 1               | 1.13                       | Exo-9                                                       |                            |                                                     |
| Exo-9 + Rrp6 <sub>ΔN</sub> + Mtr4                             | 2               | 1.08                       | Exo-9/Rrp6 <sub>ΔN</sub>                                    | 1.23                       | Mtr4                                                |
| Exo-9 + Rrp6 <sub>ΔNLS</sub> /Rrp47                           | 1               | 1.05                       | Exo-9/Rrp6 <sub>ΔNLS</sub> /Rrp47                           |                            |                                                     |
| Exo-9 + Rrp6 <sub>ΔNLS</sub> /Rrp47 + Mtr4                    | 1               | 1.02                       | Exo-9/Rrp6 <sub>ΔNLS</sub> /Rrp47/Mtr4                      |                            |                                                     |
| Rrp44                                                         | 1               | 1.31                       | Rrp44                                                       |                            |                                                     |
| Exo-9 + Mtr4 + Mpp6                                           | 2               | 1.09                       | Exo-9/Mpp6                                                  | 1.21                       | Mtr4                                                |
| Exo-9 + Rrp6 <sub>ΔNLS</sub> /Rrp47 + Mtr4 + Mpp6             | 1               | 1.01                       | Exo-9/Rrp6 <sub>ΔNLS</sub> /Rrp47/Mtr4/Mpp6                 |                            |                                                     |
| Exo-9 + Rrp44 + Rrp6 <sub>ΔNLS</sub> /Rrp47 + Mtr4 + Mpp6     | 1               | 1.01                       | Exo-9/Rrp44/Rrp6 <sub>ΔNLS</sub> /Rrp47/Mtr4/Mpp6           |                            |                                                     |
| Rrp6 <sub>N</sub> /Rrp47 <sub>ΔC</sub>                        | 1               | 1.52                       | Rrp6 <sub>N</sub> /Rrp47 <sub>ΔC</sub>                      |                            |                                                     |
| Mtr4 <sub>Δ80</sub>                                           | 1               | 1.31                       | Mtr4 <sub>Δ80</sub>                                         |                            |                                                     |
| Mtr4 <sub>Δ80</sub> + Rrp6 <sub>N</sub> /Rrp47 <sub>ΔC</sub>  | 2               | 1.31                       | Mtr4 <sub>Δ80</sub>                                         | 1.51                       | Rrp6 <sub>N</sub> /Rrp47 <sub>ΔC</sub>              |
| Mtr4 + Rrp6 <sub>N</sub> /Rrp47 <sub>ΔC</sub>                 | 2               | 1.22                       | Mtr4/Rrp6 <sub>N</sub> /Rrp47 <sub>ΔC</sub>                 | 1.51                       | Rrp6 <sub>N</sub> /Rrp47 <sub>ΔC</sub> <sup>†</sup> |
| Mtr4 <sub>80</sub>                                            | 1               | 1.57                       | Mtr4 <sub>80</sub>                                          |                            |                                                     |
| Mtr4 <sub>80</sub> + Rrp6 <sub>N</sub> /Rrp47 <sub>ΔC</sub>   | 1               | 1.43                       | Mtr4 <sub>80</sub> /Rrp6 <sub>N</sub> /Rrp47 <sub>ΔC</sub>  |                            |                                                     |
| Rrp6 <sub>N</sub>                                             | 1               | 1.56                       | Rrp6 <sub>N</sub>                                           |                            |                                                     |
| Rrp47 <sub>ΔC</sub>                                           | 1               | 1.46                       | Rrp47 <sub>ΔC</sub>                                         |                            |                                                     |
| Mtr4 + Rrp6 <sub>N</sub>                                      | 2               | 1.23                       | Mtr4                                                        | 1.56                       | Rrp6 <sub>N</sub>                                   |
| Mtr4 + Rrp47 <sub>ΔC</sub>                                    | 2               | 1.24                       | Mtr4                                                        | 1.46                       | Rrp47 <sub>ΔC</sub>                                 |
| <i>N.crassa</i> Mtr4                                          | 1               | 1.20                       | <i>N.crassa</i> Mtr4                                        |                            |                                                     |
| <i>N.crassa</i> Mtr4 + Rrp6 <sub>N</sub> /Rrp47 <sub>ΔC</sub> | 2               | 1.18                       | <i>N.crassa</i> Mtr4/Rrp6 <sub>N</sub> /Rrp47 <sub>ΔC</sub> | 1.50                       | Rrp6 <sub>N</sub> /Rrp47 <sub>ΔC</sub> <sup>†</sup> |

\* identified by SDS-PAGE

† excessive free component
