# Supplementary material
Source: PubMed Central journal article supplement (PMC4282559)

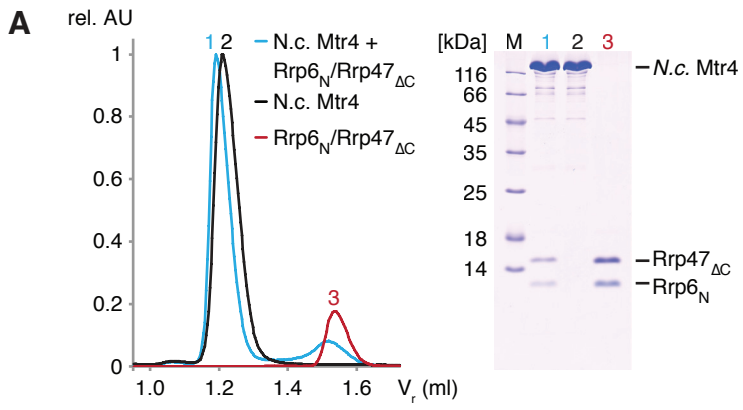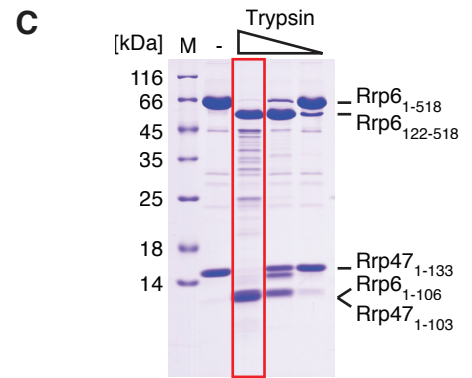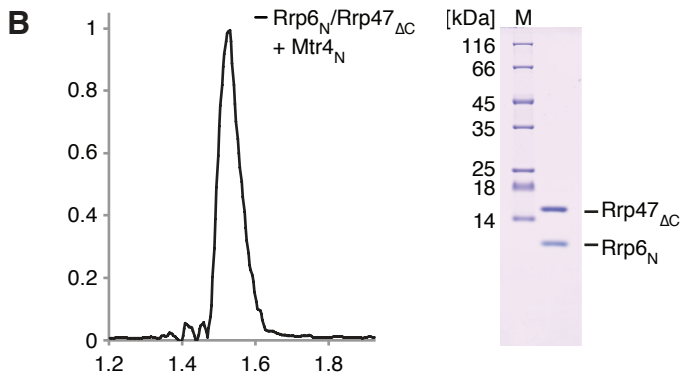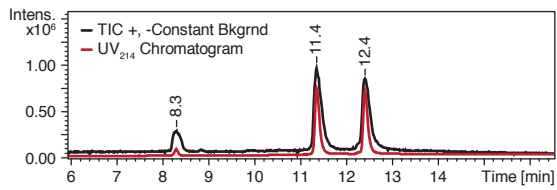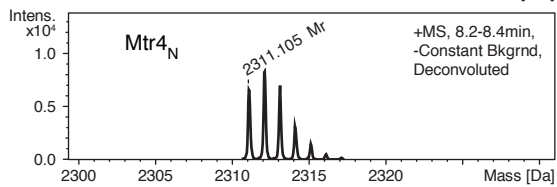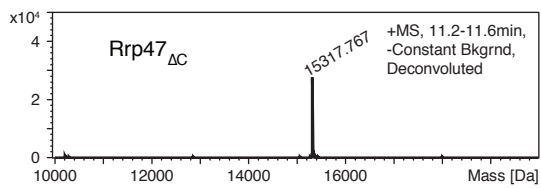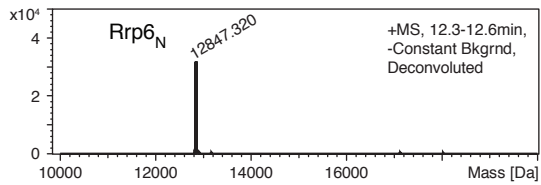

Supplement: embj0033-2829-sd1.pdf [file embj0033-2829-sd1.pdf]

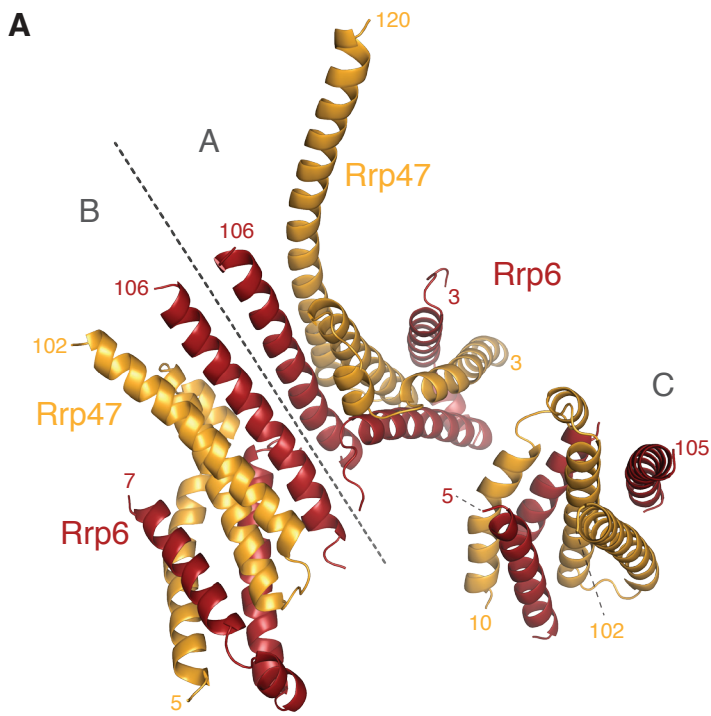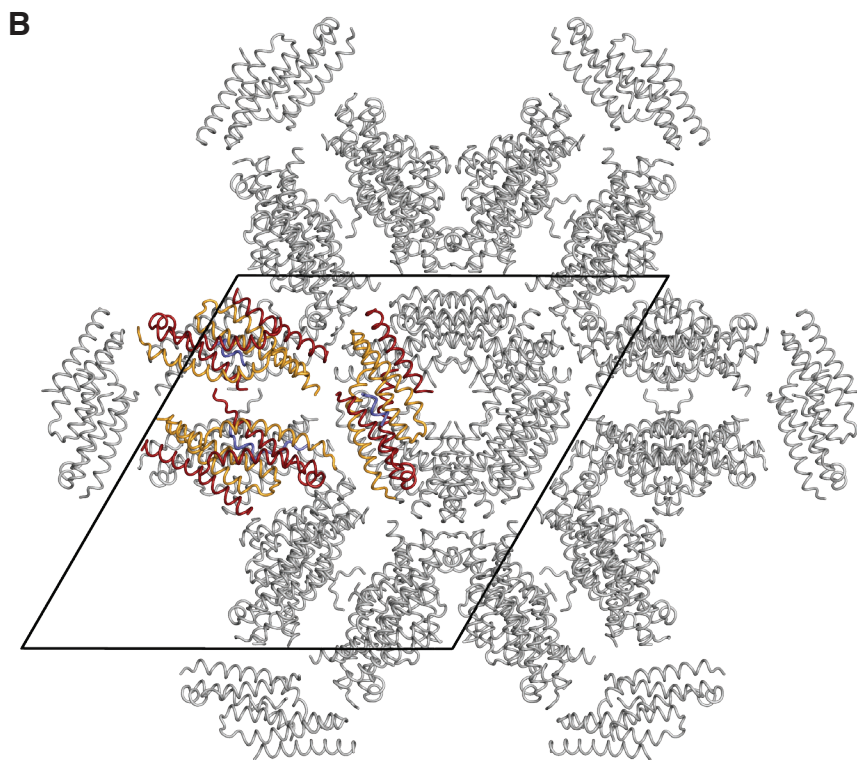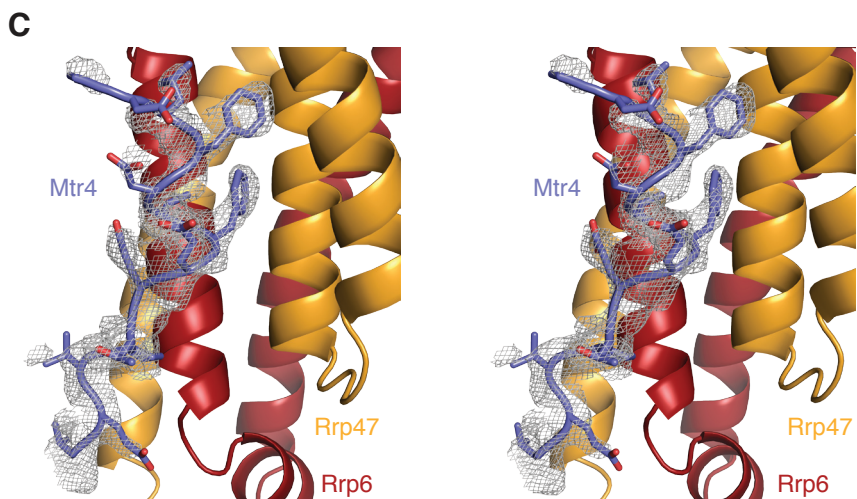

Supplement: embj0033-2829-sd2.pdf [file embj0033-2829-sd2.pdf]

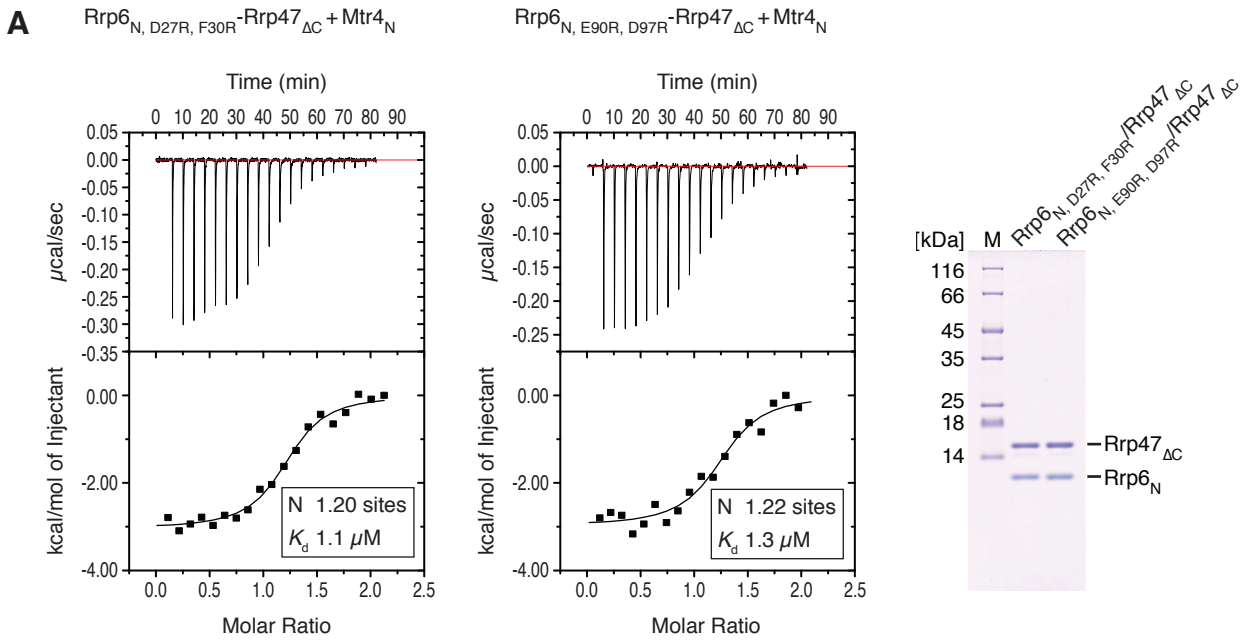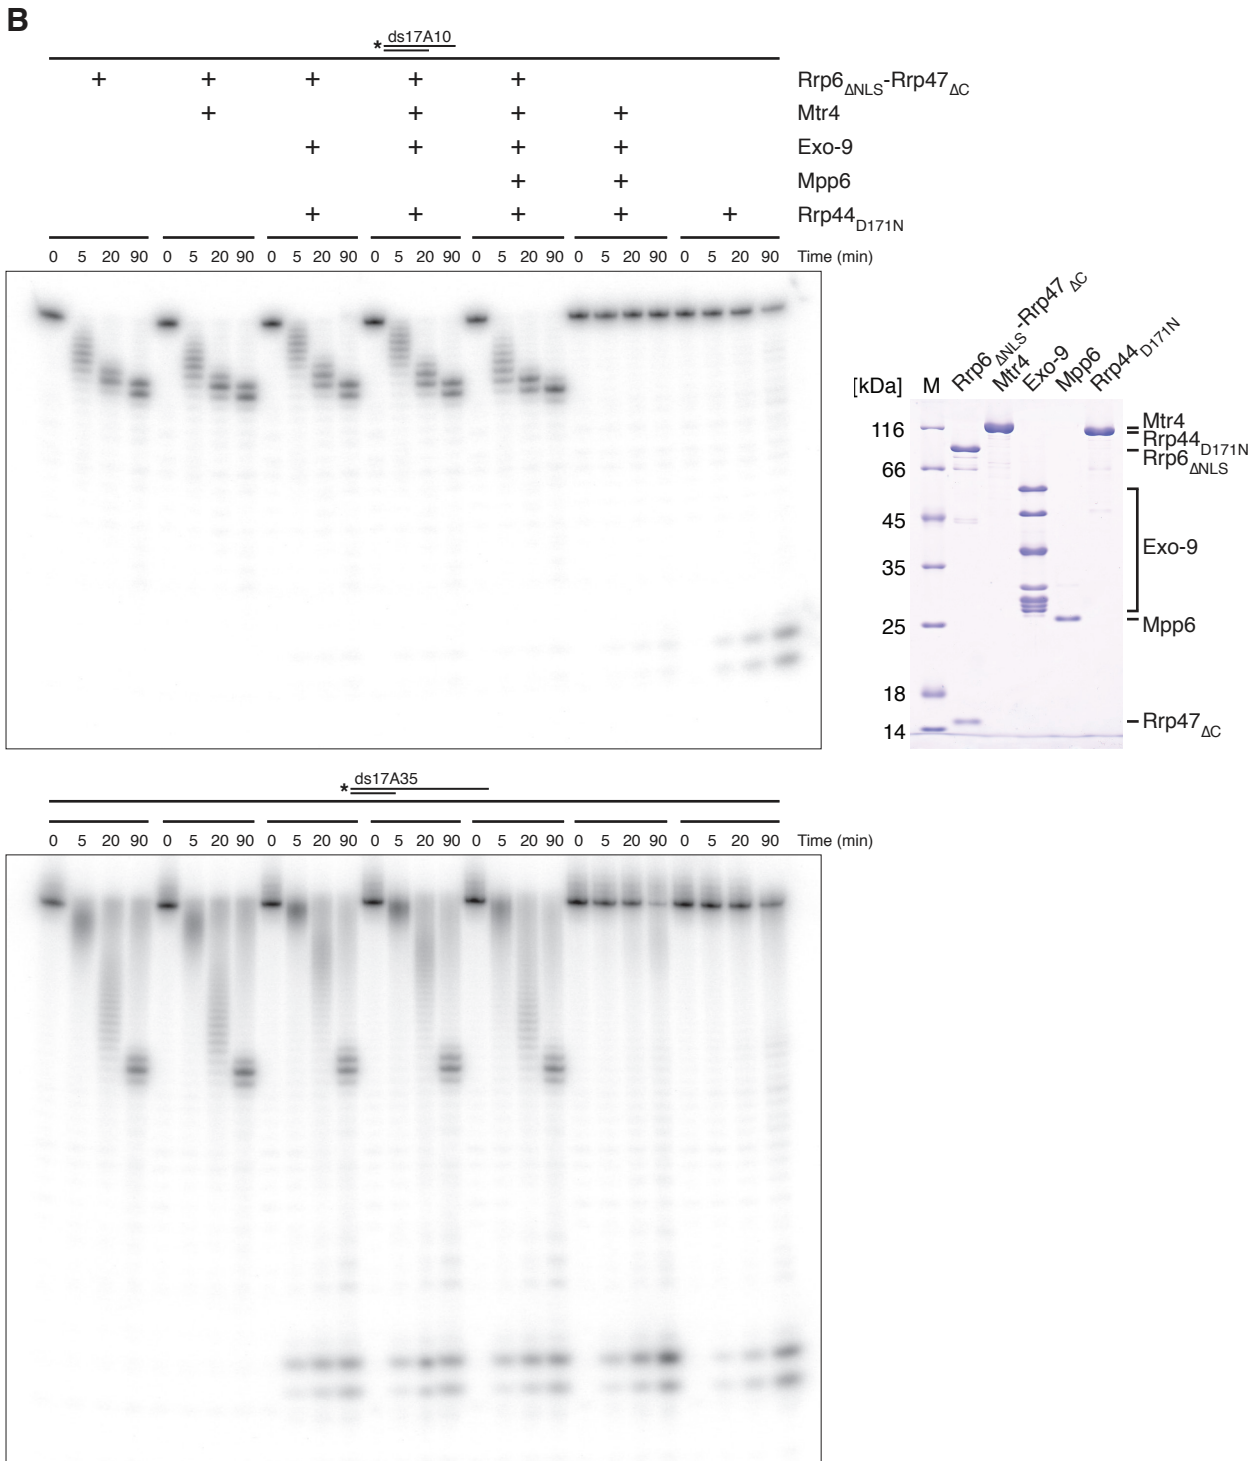

Supplement: embj0033-2829-sd3.pdf [file embj0033-2829-sd3.pdf]

**A**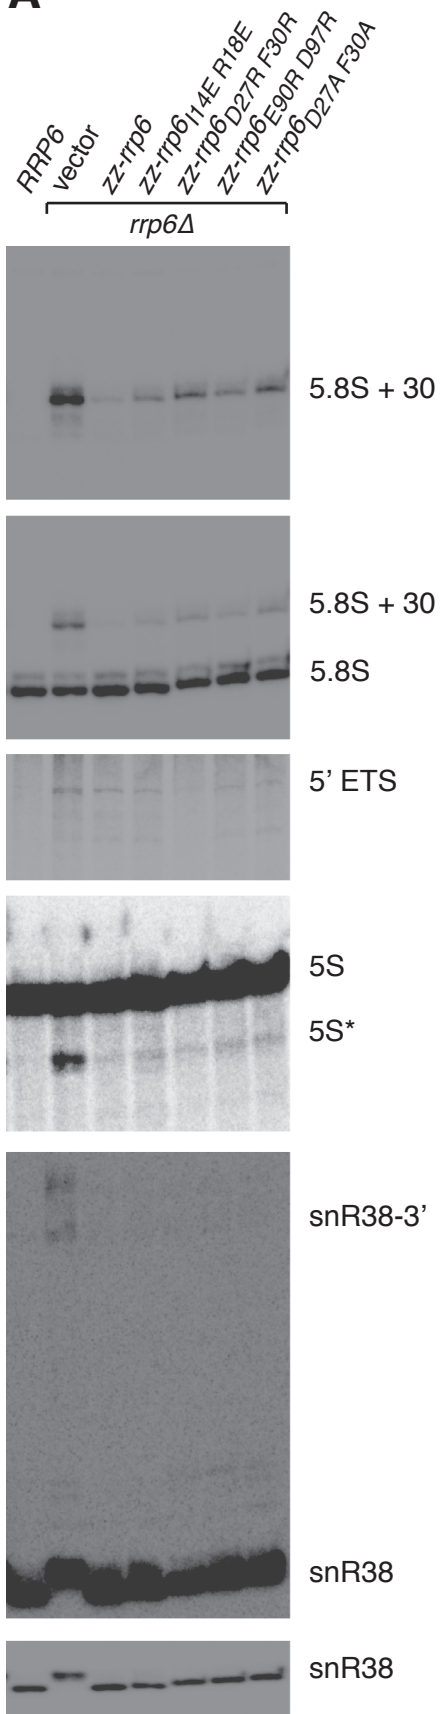**B**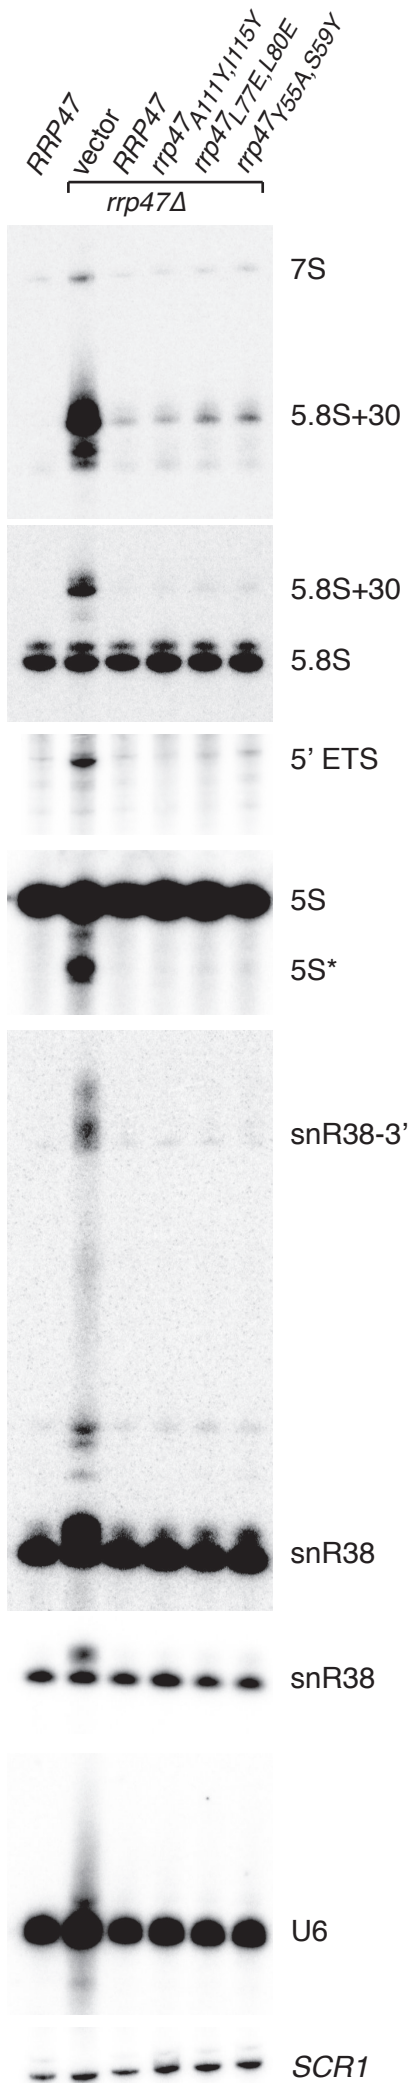

Supplement: embj0033-2829-sd4.pdf [file embj0033-2829-sd4.pdf]
